# Supplementary material for: Polygalasaponin F protects hippocampal neurons against glutamate-induced cytotoxicity
Source: PubMed Central journal article supplement — Neural Regen Res. 2021 Jun 7;17(1):178–84. doi: 10.4103/1673-5374.314321 (PMC8451577; doi:10.4103/1673-5374.314321), 2021-06-07
Supplement: NRR-17-178_Suppl1.pdf [file NRR-17-178_Suppl1.pdf]

## OPEN PEER REVIEW REPORT 1

**Name of journal:** Neural Regeneration Research

**Manuscript NO:** NRR-D-20-00698

**Title:** PSGF Protects Cultured Hippocampal Neurons against Glutamate-induced Cytotoxicity via regulating NMDA receptors

**Reviewer's Name:** Diana Amantea

**Reviewer's country:** Italy

### COMMENTS TO AUTHORS

This manuscript investigates the neuroprotective effects of Polygalasaponin F (PGSF), a triterpenoid saponin monomer isolated from *Polygala japonica*, a traditional Chinese medical herb. To this end, the authors tested the effects of different concentrations of PGSF on hippocampal cells exposed to excitotoxic levels of glutamate. Thus, PGSF prevents glutamate-induced cell death, calcium overload, NMDA-mediated EPSC, regulation of NMDAR subunits expression and suppression of pro-survival signals. The entire work is very interesting, although some revisions should be made to improve the impact of the manuscript.

- Title: please, substitute the acronym PSGF with the name of the compound (i.e., "Polygalasaponin F protects cultured...")

- Page 2, lines 3-5: please, rephrase the first sentence of the abstract taking into account that NMDA receptor activation by excitatory aminoacids produces different forms of cell death, including apoptosis and necrosis.

- Page 2, line 22: being an in vitro study, I would suggest to replace "dose-dependent" with "concentration-dependent" throughout the manuscript (e.g., see also page 8, lines 11, 16 and 41, etc.)

- In figure 1D the authors represent a concentration-response curve, though their approach is inaccurate since these graphs should be semi-logarithmic (i.e., linear for y-axis, log for x-axis). Moreover, as it is, this graph reproduces the same data of figure 1C.

Statistical analysis (page 7): the authors should specify (here and in figure legends) how many replicates were used to obtain mean values. Moreover, the statistical test used is inappropriate for multiple comparisons: ANOVA followed by Dunnett's or Tukey's should be used instead.

Reference [18] (Sun et al 2012) demonstrates that PSGF is able to activate NMDAR. The discrepancy between the work of Sun and the major findings of this manuscript should be adequately discussed.

A very recent work demonstrates the neuroprotective effects of PSGF (Xie et al. Polygalasaponin F inhibits neuronal apoptosis induced by oxygen-glucose deprivation and reoxygenation through the PI3K/Akt pathway *Basic Clin Pharmacol Toxicol* 2020 Sep;127(3):196-204. doi: 10.1111/bcpt.13408). I strongly suggest to include this reference and to opportunistically discuss it in the text.

Page 12, line 42: the authors state that "PGSF is a low-affinity NMDAR antagonist", based on the evidence that it "partially" suppresses NMDAR-mediated EPSP. This statement should be rephrased, since the observed effect may actually derive from the submaximal concentration of PGSF used. In fact, to demonstrate "low-affinity" the authors should use receptor binding techniques, otherwise they cannot keep this statement as it is.
