# Supplementary material for: Polygalasaponin F protects hippocampal neurons against glutamate-induced cytotoxicity
Source: PubMed Central journal article supplement — Neural Regen Res. 2021 Jun 7;17(1):178–84. doi: 10.4103/1673-5374.314321 (PMC8451577; doi:10.4103/1673-5374.314321), 2021-06-07
Supplement: NRR-17-178_Suppl2.pdf [file NRR-17-178_Suppl2.pdf]

## OPEN PEER REVIEW REPORT 2

**Name of journal:** Neural Regeneration Research

**Manuscript NO:** NRR-D-20-00698

**Title:** PSGF Protects Cultured Hippocampal Neurons against Glutamate-induced Cytotoxicity via regulating NMDA receptors

**Reviewer's Name:** Ubaldo Armato

**Reviewer's country:** Italy

### COMMENTS TO AUTHORS

The work is well conceived and carried out. However, there are some issues that must be taken care of prior to its publication.

- The sources of all the reagents and materials used in the must be mentioned
- A list of the abbreviations used should be helpful (e.er. what is "PI"?)
- p. 8, line 47: how the toxicity of PSGF by itself was determined should be mentioned in the Materials & Methods
- p. 9, lines 42-44: how the absence of extracellular Ca<sup>2+</sup> was technically obtained should be specified in the Materials and Methods
- Regarding the potential therapeutic applications, can the PGSF doses used be actually reached in the hippocampus of a living organism (animal or human)?
